# Supplementary material
Source: PubMed Central journal article supplement (PMC2265117)

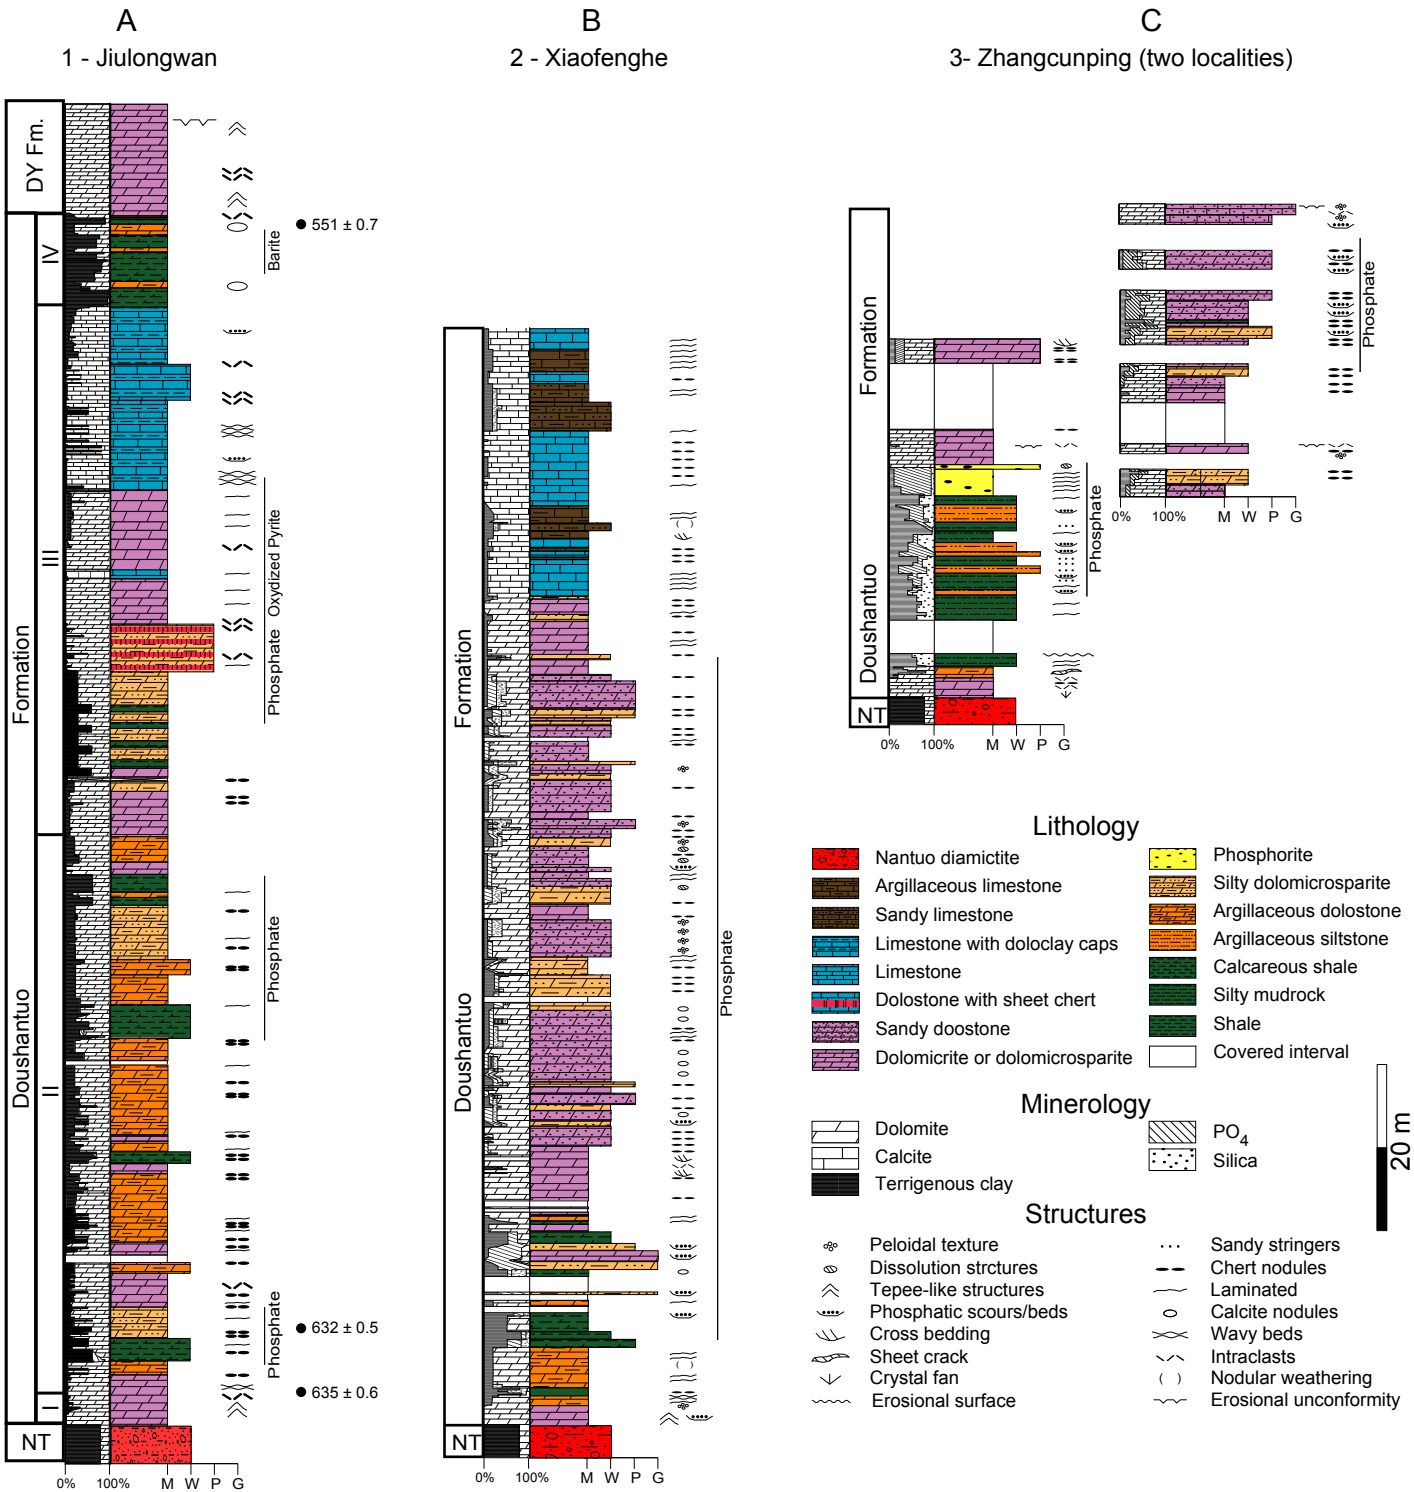

Supplement: pnas_0708336105_2.pdf [file pnas_0708336105_2.pdf]

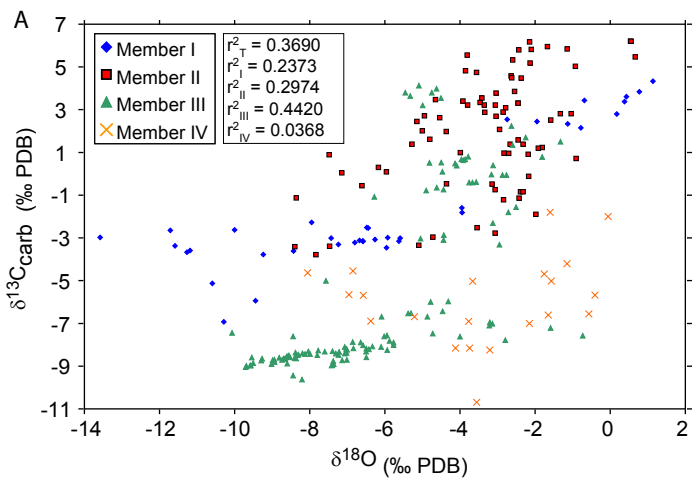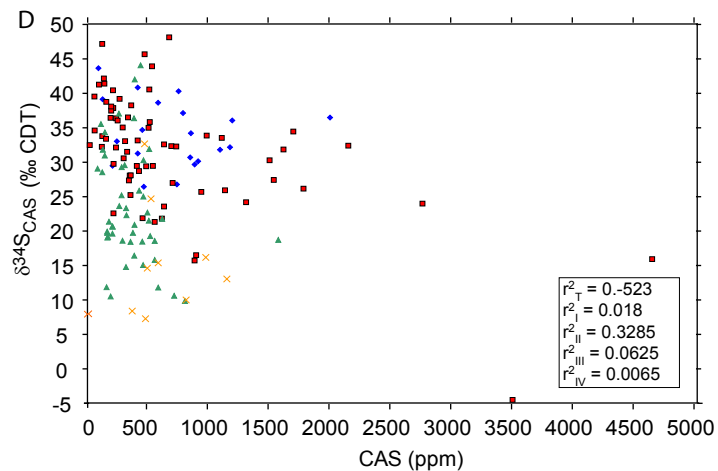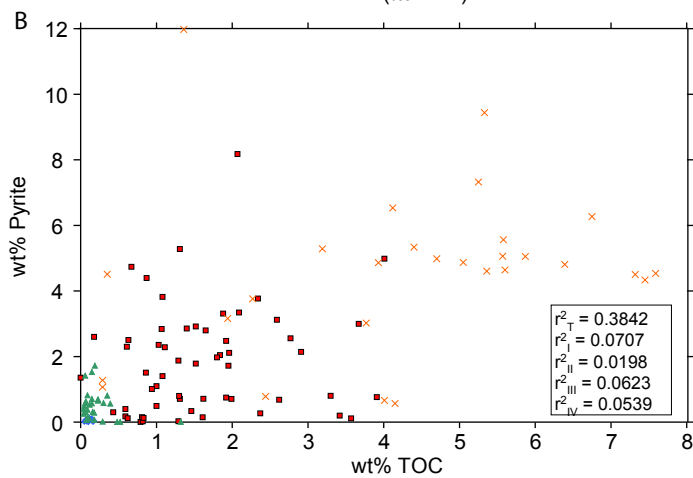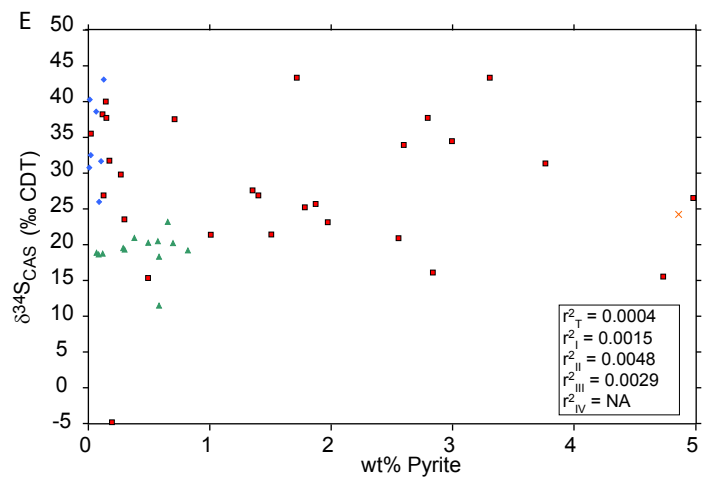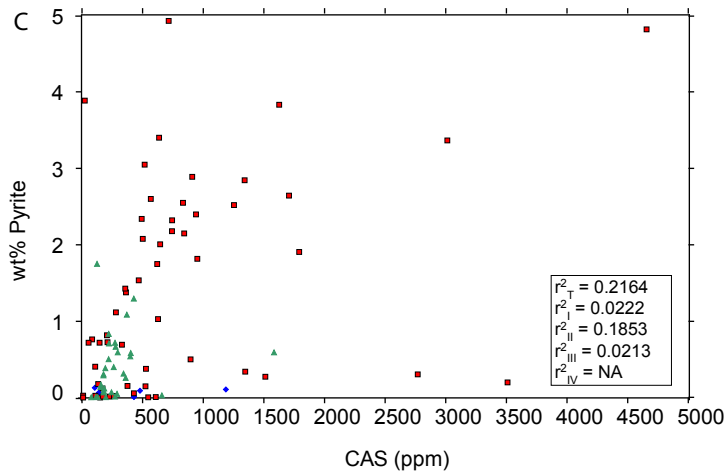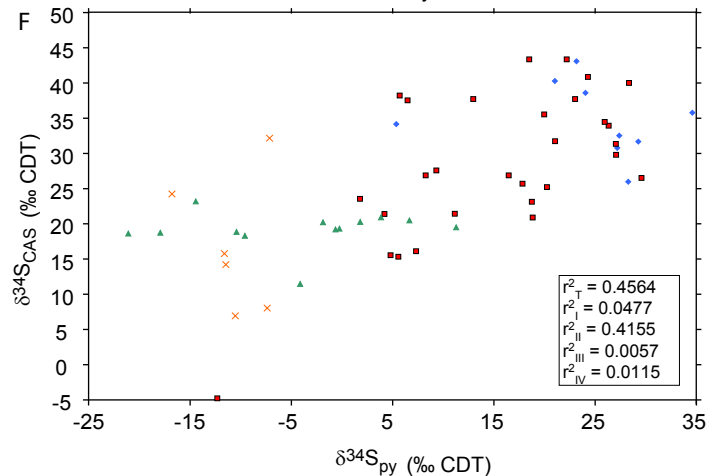

Supplement: pnas_0708336105_5.pdf [file pnas_0708336105_5.pdf]
